# Supplementary material for: Autophagy modulates endothelial junctions to restrain neutrophil diapedesis during inflammation
Source: PubMed Central journal article supplement (PMC8459396; doi:10.1016/j.immuni.2021.07.012), 2021-09-14
Supplement: mmc1.pdf [file mmc1.pdf]

**Supplemental information**

**Autophagy modulates endothelial  
junctions to restrain neutrophil  
diapedesis during inflammation**

**Natalia Reglero-Real, Lorena Pérez-Gutiérrez, Azumi Yoshimura, Loïc Rolas, José Garrido-Mesa, Anna Barkaway, Catherine Pickworth, Rebeca S. Saleeb, Maria Gonzalez-Nuñez, Shani N. Austin-Williams, Dianne Cooper, Laura Vázquez-Martínez, Tao Fu, Giulia De Rossi, Matthew Golding, Mathieu-Benoît Voisin, Chantal M. Boulanger, Yoshiaki Kubota, William A. Muller, Sharon A. Tooze, Thomas D. Nightingale, Lucy Collinson, Mauro Perretti, Ezra Aksoy, and Sussan Nourshargh**

## Figure S1

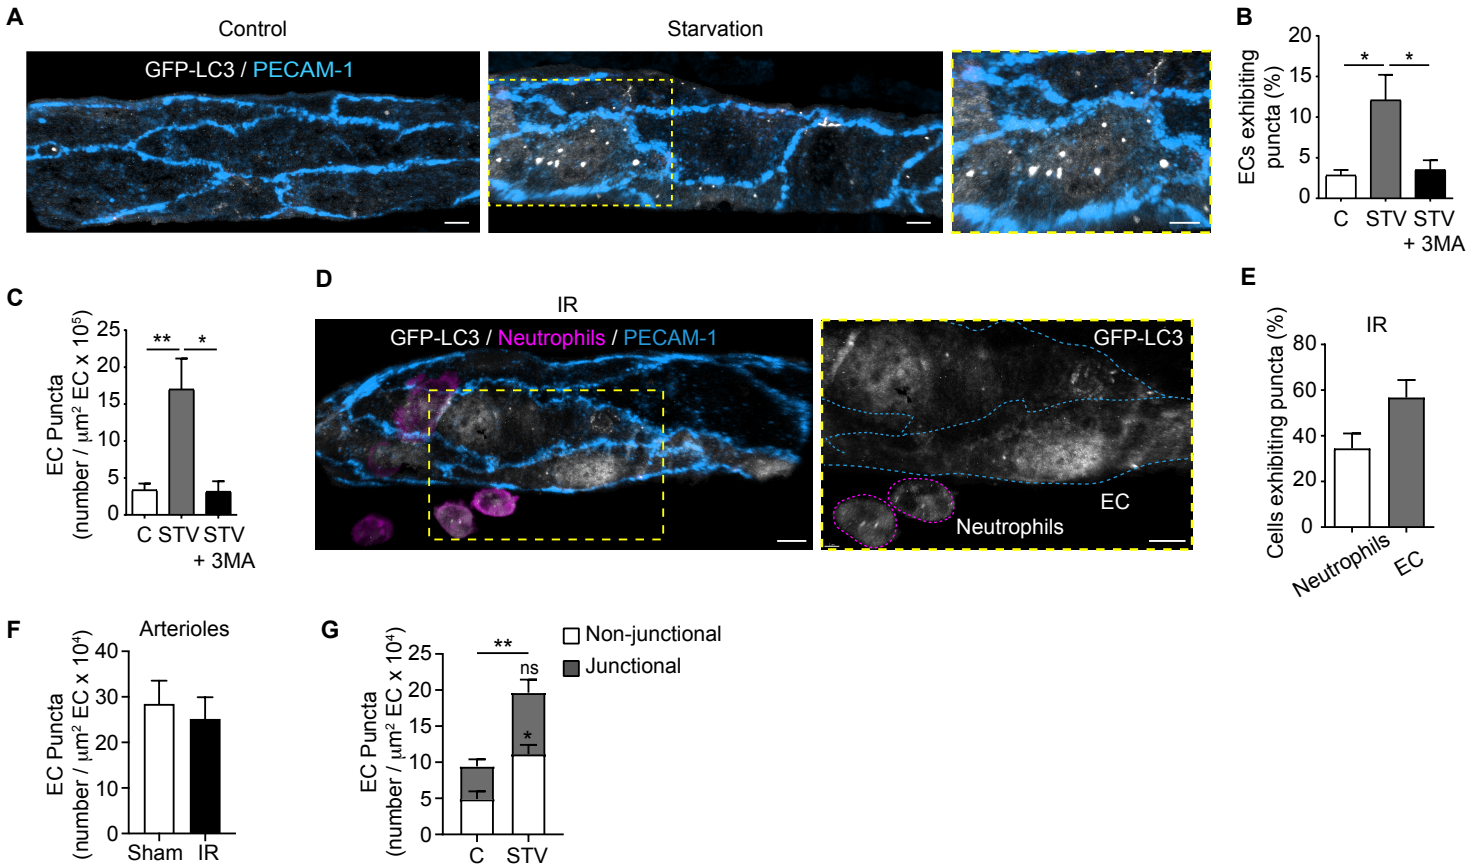

**Figure S1 (Related to Figure 1). ECs exhibit GFP-LC3 puncta *in vivo* in response to starvation and inflammation.** (A-C) *GFP-Map1lc3a*<sup>TG/+</sup> mice were starved for 24 h. (A) Representative (n=7) confocal images of post-capillary venules (PCVs, PECAM-1) (scale bar 5  $\mu\text{m}$ ). (B) Percentage of venular ECs exhibiting puncta and (C) number of puncta per EC area in control and 3-MA-treated tissues, as quantified by confocal microscopy (n= 4-7 mice/group). (D-F) *GFP-Map1lc3a*<sup>TG/+</sup> mice were subjected to local IR injury. (D) Representative confocal images (n=4) of PCVs (PECAM-1) stained for neutrophils (MRP14) (scale bar 5  $\mu\text{m}$ ). (E) Percentage of neutrophils and ECs exhibiting puncta (n=3-4 mice/group) and (F) quantification of GFP-LC3 puncta per arteriolar EC area, as assessed by confocal microscopy (n=3-6 mice/group). (G) *GFP-Map1lc3a*<sup>TG/+</sup> mice were starved for 24 h and cremasteric PCVs analyzed for GFP-LC3 puncta localization by confocal microscopy (n=4-7 mice/group). Dashed boxes delineate magnified areas. Means  $\pm$  SEM. Statistically significant difference from controls is shown by \*P< 0.05 and \*\*P< 0.01; ns, not significant.

## Figure S2

A

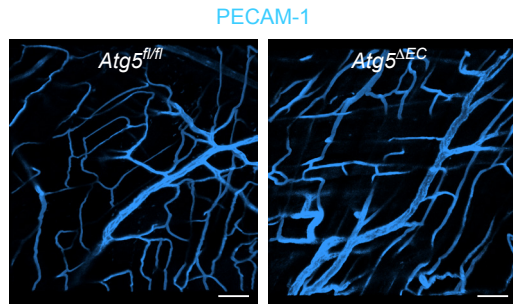

B

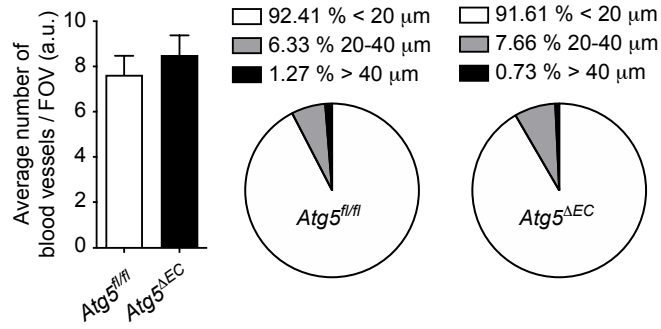

C

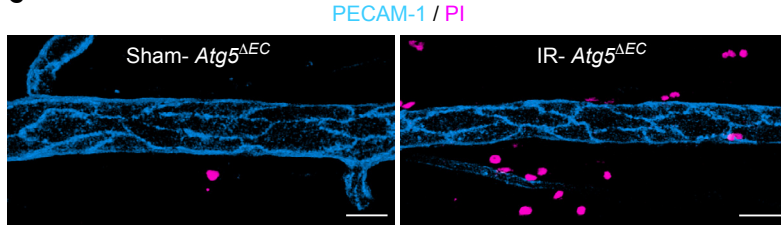

D

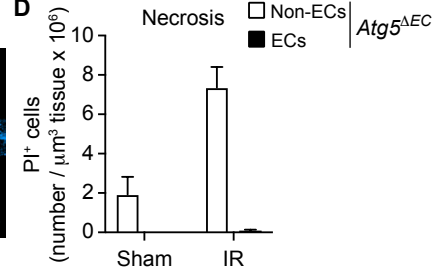

E

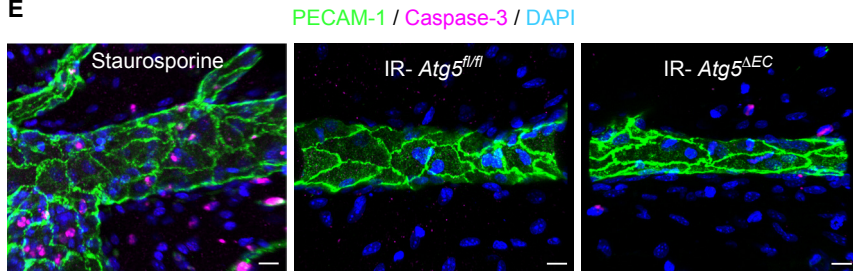

F

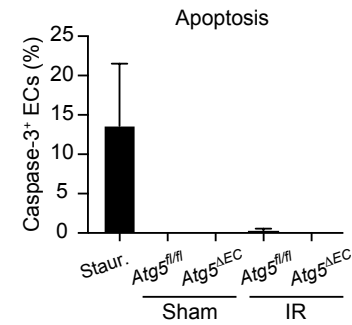

**Figure S2 (Related to Figure 2). ATG5 deficient ECs are viable and healthy *in vivo*.** (A) Representative confocal images (n=4) and (B) quantification of the number and size of blood vessels in post-capillary venules (PCVs) of *Atg5<sup>fl/fl</sup>* and *Atg5<sup>ΔEC</sup>* mice, as quantified by confocal microscopy (n=4 mice/group). (C-F) *Atg5<sup>fl/fl</sup>* and *Atg5<sup>ΔEC</sup>* mice were subjected to local IR injury. (C) Representative confocal images (n=4) of PCVs (PECAM-1) stained for propidium iodide (PI) and (D) quantification of necrotic cells (PI+) within *Atg5<sup>ΔEC</sup>* mice, as quantified by confocal IVM (n=4 mice/group). (E) Representative confocal images (n=3) of PCVs (PECAM-1) stained for apoptotic cells (Caspase-3, scale bar 15 μm) and (F) percentage of Caspase-3 positive ECs, as assessed by confocal microscopy (n=3 mice/group). Means ± SEM.

**Figure S3**

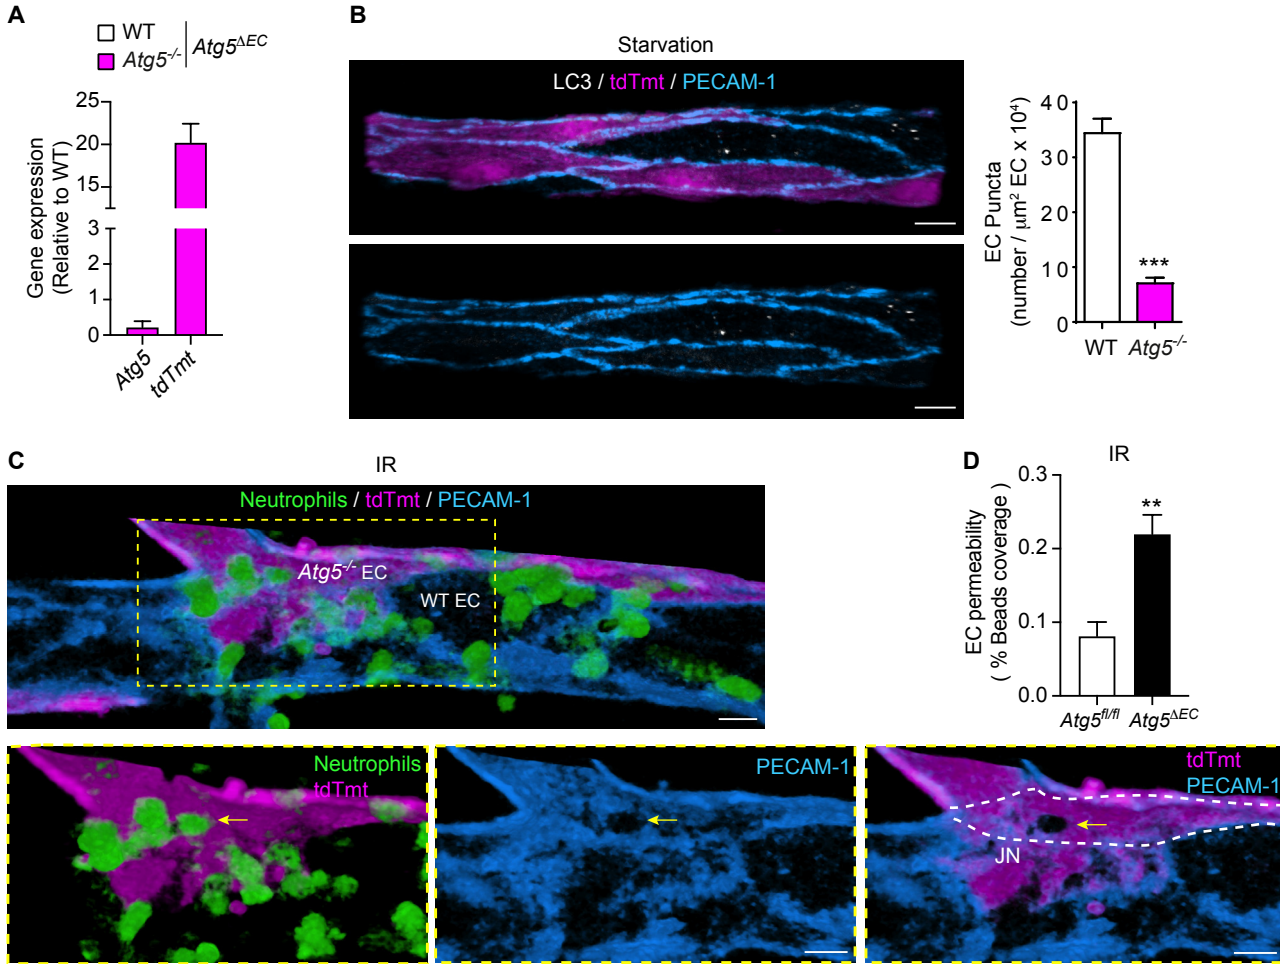

**Figure S3 (Related to Figure 3). EC ATG5 deficiency inhibits LC3 puncta formation *in vivo* and supports neutrophil transcellular TEM. (A)** Lung ECs of *Atg5<sup>ΔEC</sup>* mice were analyzed for *Atg5* and *tdTomato* mRNA levels by RT-qPCR (n=3 mice/group). **(B)** Representative confocal images (n=3) of cremasteric post-capillary venules (PCVs) of starved *Atg5<sup>ΔEC</sup>* mice stained for endogenous LC3, and associated quantification of LC3 puncta per venular EC area of *tdTomato*<sup>-</sup>, wild-type (WT) ECs and *tdTomato*<sup>+</sup>, *Atg5<sup>-/-</sup>* ECs (scale bar 7  $\mu\text{m}$ , n=3 mice/group). **(C-D)** *Atg5<sup>fl/fl</sup>* and *Atg5<sup>ΔEC</sup>* mice were subjected to local IR injury. **(C)** Representative confocal images (n=7) of a PCV supporting neutrophil transcellular TEM as shown through establishment of a pore in the body of an *Atg5<sup>-/-</sup>* (*tdTmt*<sup>+</sup>) EC (arrow, scale bar 10  $\mu\text{m}$ ). **(D)** Quantification of EC permeability in *Atg5<sup>fl/fl</sup>* and *Atg5<sup>ΔEC</sup>* mice, as assessed by confocal microscopy (n=3-4 mice/group). Dashed boxes delineate magnified areas. Means  $\pm$  SEM. Statistically significant difference from controls is shown by \*\*P < 0.01 and \*\*\*P < 0.001.

**Figure S4**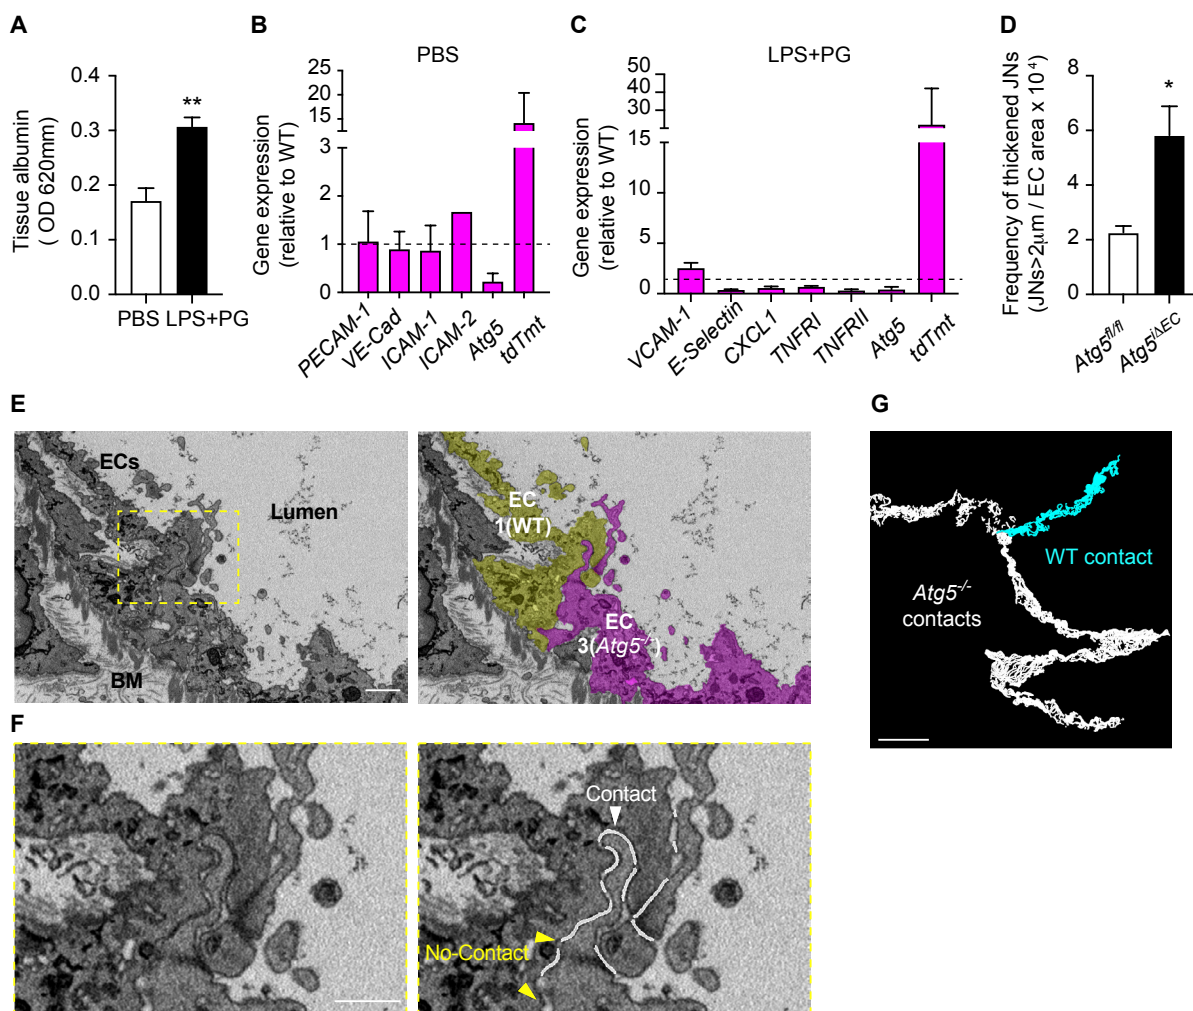

**Figure S4 (Related to Figure 4). ATG5-dependent autophagy regulates the architecture and molecular composition of EC contacts.** (A-C) *Atg5<sup>ΔEC</sup>* mice were subjected to PBS or a model of endotoxemia (LPS+PG). (A) Quantification of lung vascular leakage, as assessed by local Evans blue extravasation (n=3 mice/group). mRNA levels under (B) basal and (C) endotoxemia conditions in lung ECs from *Atg5<sup>ΔEC</sup>* mice, as assessed by RT-qPCR (n=3-5 mice/group). (D) Frequency of thickened junctions in post-capillary venules of IR-stimulated *Atg5<sup>ΔEC</sup>* mice, as quantified by confocal microscopy (n=3-4 mice/group). (E-G) One *Atg5<sup>ΔEC</sup>* mouse was subjected to local IR injury. Electron micrographs of WT and *Atg5<sup>-/-</sup>* ECs shown in Figure 4J illustrating segmentation of (E) ECs and (F) cell-cell contacts (scale bars 1 µm and 0.5 µm, respectively). (G) 3D reconstruction of segmented cell-cell contacts following SBF-SEM of ECs depicted in Figure 4K (scale bar 5 µm). Dashed box delineates magnified area. Means ± SEM. Statistically significant difference from controls or between indicated groups is shown by \*P<0.05 and \*\*P<0.01. BM, Basement membrane.

**Figure S5**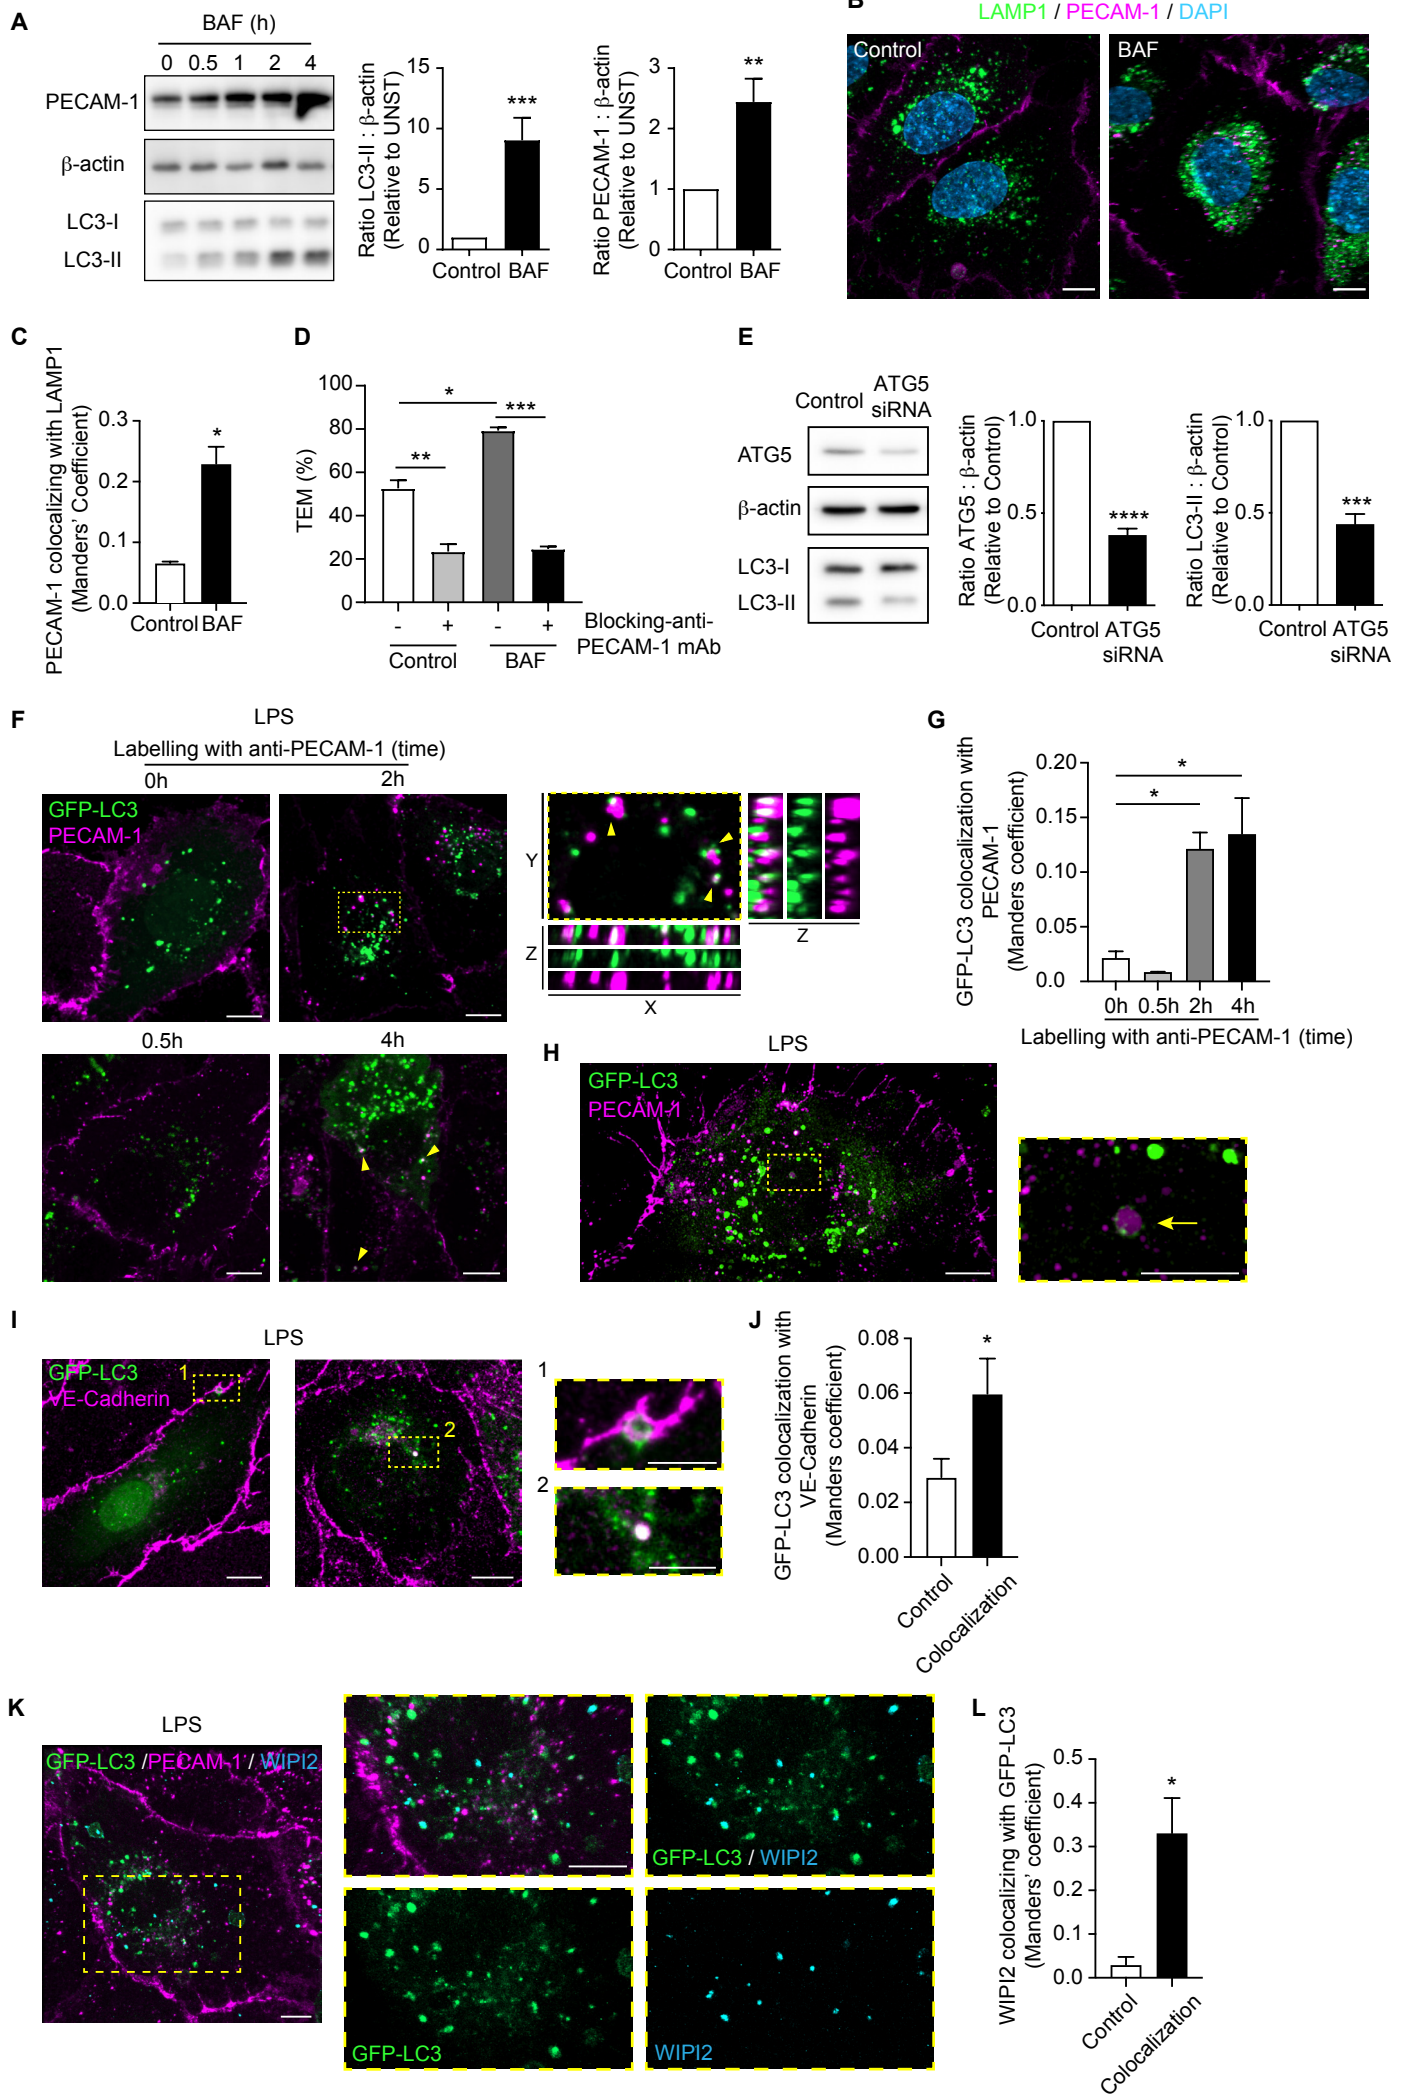

**Figure S5 (Related to Figure 5). Bafilomycin A1 increases PECAM-1 protein levels and supports enhanced neutrophil TEM and internalized surface PECAM-1 localizes to GFP-LC3 positive compartments. (A-D)** HUVECs were treated with bafilomycin A1 (BAF, 100 nM) for 4 h or the indicated times. **(A)** Immunoblot of total PECAM-1, LC3-I and LC3-II with  $\beta$ -actin acting as loading protein control and associated quantifications of fold increase of LC3-II and PECAM-1 relative to unstimulated conditions (n=11). **(B)** Representative confocal images (n=3) of HUVECs immunostained for PECAM-1 and LAMP1 and **(C)** associated quantification of PECAM-1 colocalization with LAMP1 (n=3, scale bars 10  $\mu$ m). **(D)** Neutrophil TEM in the presence or absence of a blocking anti-PECAM-1 mAb (n=3). **(E)** Immunoblot of total ATG5 and LC3-II with  $\beta$ -actin acting as loading protein control for ATG5 silenced and control HUVECs and associated quantifications showing ATG5 and LC3-II fold change (n=6). **(F-L)** GFP-LC3 transfected HUVECs were stimulated with LPS for 4 h. **(F)** Representative confocal images (n=3-5) of GFP-LC3<sup>+</sup> PECAM-1<sup>+</sup> vesicles at the indicated times after incubation with anti-PECAM-1 mAb by antibody feeding (scale bars 10  $\mu$ m); and **(G)** associated quantification of GFP-LC3 colocalization with PECAM-1, as quantified by Manders' coefficient (n=3-5; 40-100 cells analyzed per condition). **(H)** Representative super-resolution confocal image (n=1) of a GFP-LC3-associated vesicle containing PECAM-1 (arrow, scale bars 10  $\mu$ m). **(I)** Representative confocal images (n=4) of GFP-LC3 transfected HUVECs immunostained for VE-Cadherin (scale bars 10  $\mu$ m and enlargements 5  $\mu$ m) and **(J)** quantification of GFP-LC3 colocalization with VE-Cadherin as compared to its offset control, as quantified by Manders' coefficient (n=4; >100 cells analyzed). **(K)** Representative confocal images (n=4) of GFP-LC3 transfected HUVECs immunostained for PECAM-1 and WIPI2, showing GFP-LC3<sup>+</sup> and WIPI2<sup>+</sup> vesicles (scale bar 10  $\mu$ m) and **(L)** associated quantification of WIPI2 colocalization with GFP-LC3 as compared to its offset control, as quantified by Manders' coefficient (n=4; >100 cells analyzed). Dashed boxes delineate magnified areas. Means  $\pm$  SEM. Statistically significant difference from controls or between indicated groups is shown by \*P < 0.05, \*\*P < 0.01, \*\*\*P < 0.001 and \*\*\*\*P < 0.0001.

## Figure S6

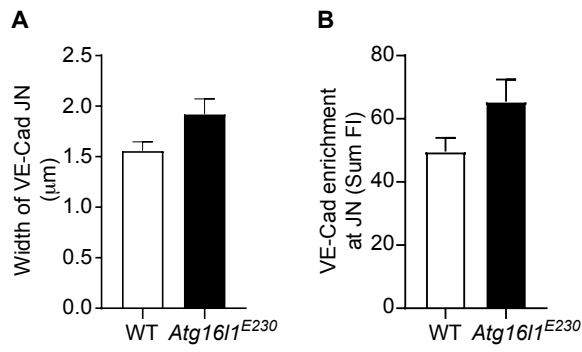

**Figure S6 (Related to Figure 6). VE-Cadherin junctional expression in post-capillary venules from *Atg16L1<sup>E230</sup>* mice.** WT and *Atg16L1<sup>E230</sup>* mice were subjected to local IR injury. Quantification of VE-Cadherin (**A**) junctional width and (**B**) protein enrichment, as assessed by confocal microscopy (n=3 mice/group; 12-19 vessels quantified per condition). Means  $\pm$  SEM.
